# Supplementary material for: Poisson Parameters of Antimicrobial Activity: A Quantitative Structure-Activity Approach
Source: MDPI journal article supplement (doi:10.3390/ijms13045207), 2012-04-24
Supplement: s1 [file s1]

# Supplementary Information

**Table. S.1.** The analysis of probability distribution function for antimicrobial activity of a given chemical on bacteria series.

| test                   | PubChem ID<br>Compounds      | SA | EF | EC | PV | PA | SS | KP | CA | N      | pK-S     | pA-D     | pF-C-S   | pK-S    | pA-D    | pF-C-S  | pK-S    | pA-D    | pF-C-S               | -ln(pC-S)            | Mode          | Mean     | Var    | StDev  | Skewness | EKurt  | Median |        |  |
|------------------------|------------------------------|----|----|----|----|----|----|----|----|--------|----------|----------|----------|---------|---------|---------|---------|---------|----------------------|----------------------|---------------|----------|--------|--------|----------|--------|--------|--------|--|
|                        |                              |    |    |    |    |    |    |    |    |        | Binomial | Binomial | Binomial | NegBino | NegBino | NegBino | Poisson | Poisson | Poisson              | Poisson              |               |          |        |        |          |        |        |        |  |
| Fit1                   | <a href="#">CID: 638011</a>  | 15 | 23 | 11 | 9  | 10 | 8  | 9  | 28 | 8      | 0.0000   | 0.0000   | 0.0000   | 0.32    | 0.3153  | 0.3191  | 0.16    | 0.0446  | 0.0847               | 2.47 Poisson(14.125) | 14            | 14.125   | 14.125 | 3.758  | 0.266    | 0.071  | 13.457 |        |  |
| Fit2                   | <a href="#">CID: 637566</a>  | 15 | 12 | 15 | 12 | 11 | 10 | 10 | 25 | 8      | 0.0000   | 0.0000   | 0.0000   | 0.49    | 0.4373  | 0.4631  | 0.65    | 0.4021  | 0.5129               | 0.67 Poisson(13.75)  | 13            | 13.750   | 13.750 | 3.708  | 0.270    | 0.073  | 13.082 |        |  |
| Fit3                   | <a href="#">CID: 5282109</a> | 10 | 9  | 7  | 8  | 8  | 7  | 7  | 15 | 8      | 0.3432   | 0.3726   | 0.3576   | 0.00    | 0.0000  | 0.0000  | 0.25    | 0.3732  | 0.3077               | 1.18 Poisson(8.875)  | 8             | 8.875    | 8.875  | 2.979  | 0.336    | 0.113  | 8.207  |        |  |
| Fit4                   | <a href="#">CID: 1549026</a> | 10 | 8  | 7  |    |    | 7  |    | 9  | 5      | 0.1851   | 0.0036   | 0.0258   | 0.00    | 0.0000  | 0.0000  | 0.25    | 0.3788  | 0.3055               | 1.19 Poisson(8.2)    | 8             | 8.200    | 8.200  | 2.864  | 0.349    | 0.122  | 7.531  |        |  |
| Fit5                   | <a href="#">CID: 5355856</a> | 10 | 11 | 7  |    | 9  | 7  | 7  | 10 | 7      | 0.3654   | 0.2295   | 0.2896   | 0.00    | 0.0000  | 0.0000  | 0.26    | 0.3572  | 0.3052               | 1.19 Poisson(8.7143) | 8             | 8.714    | 8.714  | 2.952  | 0.339    | 0.115  | 8.046  |        |  |
| Fit6                   | <a href="#">CID: 5367785</a> | 17 | 10 | 11 | 9  | 8  | 8  | 15 | 15 | 8      | 0.5900   | 0.5226   | 0.5553   | 0.00    | 0.0000  | 0.0000  | 0.64    | 0.5493  | 0.5911               | 0.53 Poisson(11.625) | 11            | 11.625   | 11.625 | 3.410  | 0.293    | 0.086  | 10.957 |        |  |
| Fit7                   | <a href="#">CID: 643779</a>  | 15 | 20 | 10 | 6  | 12 | 10 | 10 | 25 | 8      | 0.0000   | 0.0000   | 0.0000   | 0.38    | 0.4451  | 0.4138  | 0.44    | 0.2236  | 0.3125               | 1.16 Poisson(13.5)   | 13            | 13.500   | 13.500 | 3.674  | 0.272    | 0.074  | 12.932 |        |  |
| Fit8                   | <a href="#">CID: 643820</a>  | 11 | 8  | 10 | 10 | 10 | 7  | 7  | 27 | 8      | 0.0000   | 0.0000   | 0.0000   | 0.07    | 0.1390  | 0.0997  | 0.30    | 0.1231  | 0.1907               | 1.66 Poisson(11.25)  | 11            | 11.250   | 11.250 | 3.354  | 0.298    | 0.089  | 10.582 |        |  |
| Fit9                   | <a href="#">CID: 1549025</a> | 8  | 7  | 7  | 7  | 7  | 8  | 7  | 6  | 0.0000 | 0.0000   | 0.0000   | 0.00     | 0.0000  | 0.0000  | 0.03    | 0.1072  | 0.0584  | 2.84 Poisson(7.3333) | 7                    | 7.333         | 7.333    | 2.708  | 0.369  | 0.136    | 6.664  |        |        |  |
| Fit10                  | <a href="#">CID: 5352162</a> | 25 | 8  | 8  | 8  |    | 8  | 8  | 10 | 7      | 0.0000   | 0.0000   | 0.0000   | 0.02    | 0.0950  | 0.0430  | 0.08    | 0.0481  | 0.0603               | 2.81 Poisson(10.714) | 10            | 10.714   | 10.714 | 3.273  | 0.306    | 0.093  | 10.046 |        |  |
| Fit11                  | <a href="#">CID: 5365982</a> | 17 | 10 |    | 7  | 8  | 9  | 10 | 14 | 7      | 0.0000   | 0.0000   | 0.0000   | 0.83    | 0.6215  | 0.7164  | 0.82    | 0.6214  | 0.7146               | 0.34 Poisson(10.714) | 10            | 10.714   | 10.714 | 3.273  | 0.306    | 0.093  | 10.046 |        |  |
| Fit12                  | <a href="#">CID: 7794</a>    | 25 | 18 |    | 9  | 7  | 14 |    | 5  | 0.0000 | 0.0000   | 0.0000   | 0.88     | 0.5941  | 0.7212  | 0.60    | 0.2271  | 0.3692  | 1.00 Poisson(14.6)   | 14                   | 14.600        | 14.600   | 3.821  | 0.262  | 0.068    | 13.932 |        |        |  |
| Fit13                  | <a href="#">CID: 7778</a>    | 18 | 20 | 10 | 8  | 9  | 7  |    | 13 | 7      | 0.0000   | 0.0000   | 0.0000   | 0.86    | 0.5587  | 0.6917  | 0.71    | 0.3561  | 0.5043               | 0.68 Poisson(12.143) | 12            | 12.143   | 12.143 | 3.485  | 0.287    | 0.082  | 11.475 |        |  |
| Fit14                  | <a href="#">CID: 9017</a>    | 10 | 6  |    | 6  | 7  | 6  | 7  | 9  | 7      | 0.2645   | 0.0333   | 0.0939   | 0.00    | 0.0000  | 0.0000  | 0.14    | 0.3259  | 0.2168               | 1.53 Poisson(7.2857) | 7             | 7.286    | 7.286  | 2.699  | 0.370    | 0.137  | 6.617  |        |  |
| Fit15                  | <a href="#">CID: 8835</a>    | 8  | 8  |    |    | 8  | 7  | 8  | 10 | 6      | 0.1407   | 0.0043   | 0.0246   | 0.00    | 0.0000  | 0.0000  | 0.16    | 0.1734  | 0.1664               | 1.79 Poisson(8.1667) | 8             | 8.167    | 8.167  | 2.858  | 0.350    | 0.122  | 7.498  |        |  |
| Fit16                  | <a href="#">CID: 60985</a>   | 8  | 10 | 9  | 7  |    |    | 7  | 5  | 0.1851 | 0.0036   | 0.0258   | 0.00     | 0.0000  | 0.0000  | 0.25    | 0.3788  | 0.3055  | 1.19 Poisson(8.2)    | 8                    | 8.200         | 8.200    | 2.864  | 0.349  | 0.122    | 7.531  |        |        |  |
| Fit17                  | <a href="#">CID: 8834</a>    | 15 | 20 |    |    | 10 | 15 | 11 | 15 | 6      | 0.4487   | 0.5347   | 0.4898   | 0.00    | 0.0000  | 0.0000  | 0.54    | 0.5881  | 0.5654               | 0.57 Poisson(14.333) | 14            | 14.333   | 14.333 | 3.786  | 0.264    | 0.070  | 13.665 |        |  |
| Fit18                  | <a href="#">CID: 7888</a>    | 20 | 20 | 23 | 16 | 17 | 15 | 14 | 25 | 8      | 0.8732   | 0.6737   | 0.7670   | 0.00    | 0.0000  | 0.0000  | 0.95    | 0.7175  | 0.8253               | 0.19 Poisson(18.75)  | 18            | 18.750   | 18.750 | 4.330  | 0.231    | 0.053  | 18.083 |        |  |
| Fit19                  | <a href="#">CID: 27866</a>   | 8  | 10 |    | 11 | 7  |    |    | 28 | 5      | 0.0000   | 0.0000   | 0.0000   | 0.41    | 0.4053  | 0.4101  | 0.24    | 0.0604  | 0.1215               | 2.11 Poisson(12.8)   | 12            | 12.800   | 12.800 | 3.578  | 0.280    | 0.078  | 12.132 |        |  |
| Fit28                  | <a href="#">CID: 3314</a>    | 30 | 30 | 28 | 28 | 25 | 25 | 28 | 32 | 8      | 0.1904   | 0.2398   | 0.2137   | 0.00    | 0.0000  | 0.0000  | 0.35    | 0.2878  | 0.3169               | 1.15 Poisson(28.25)  | 28            | 28.250   | 28.250 | 5.315  | 0.188    | 0.035  | 27.583 |        |  |
| Fit30                  | <a href="#">CID: 64939</a>   | 27 | 27 | 11 | 23 |    | 8  |    | 5  | 0.0000 | 0.0000   | 0.0000   | 0.27     | 0.3064  | 0.2862  |         | 0.22    | 0.0268  | 0.0767               | 2.57 Poisson(19.2)   | 19            | 19.200   | 19.200 | 4.382  | 0.228    | 0.052  | 18.533 |        |  |
|                        |                              |    |    |    |    |    |    |    |    |        |          |          |          |         |         |         |         |         | F-C-S Poisson =      | 28.79                |               |          |        |        |          |        |        |        |  |
|                        |                              |    |    |    |    |    |    |    |    |        |          |          |          |         |         |         |         |         |                      |                      | 21            | 0.1190   |        |        |          |        |        |        |  |
| <b>Oils</b>            |                              |    |    |    |    |    |    |    |    |        |          |          |          |         |         |         |         |         |                      |                      |               |          |        |        |          |        |        |        |  |
| Fit20                  | Citronella oil               | 10 | 10 | 7  | 10 | 7  | 7  | 7  | 20 | 8      | 0.0000   | 0.0000   | 0.0000   | 0.28    | 0.3097  | 0.2923  | 0.56    | 0.2565  | 0.3800               | 0.97 Poisson(9.75)   | 9             | 9.750    | 9.750  | 3.122  | 0.320    | 0.103  | 9.082  |        |  |
| Fit21                  | Geranium oil Africa          | 16 | 12 | 10 | 10 | 10 | 9  | 11 | 28 | 8      | 0.0000   | 0.0000   | 0.0000   | 0.44    | 0.3325  | 0.3847  | 0.34    | 0.1554  | 0.2285               | 1.48 Poisson(13.25)  | 13            | 13.250   | 13.250 | 3.640  | 0.275    | 0.075  | 12.582 |        |  |
| Fit22                  | Geranium oil Bourbon         | 13 | 12 | 8  | 12 | 10 | 10 | 10 | 25 | 8      | 0.0000   | 0.0000   | 0.0000   | 0.58    | 0.3612  | 0.4581  | 0.63    | 0.2883  | 0.4251               | 0.86 Poisson(12.5)   | 12            | 12.500   | 12.500 | 3.536  | 0.283    | 0.080  | 11.832 |        |  |
| Fit23                  | Geranium oil China           | 20 | 13 | 14 | 9  | 9  | 9  | 10 | 25 | 8      | 0.0000   | 0.0000   | 0.0000   | 0.40    | 0.4409  | 0.4220  | 0.40    | 0.1967  | 0.2797               | 1.27 Poisson(13.625) | 13            | 13.625   | 13.625 | 3.691  | 0.271    | 0.073  | 12.957 |        |  |
| Fit24                  | Helichrysum oil              | 20 | 13 | 8  |    | 9  |    | 7  | 7  | 6      | 0.0000   | 0.0000   | 0.0000   | 0.56    | 0.5184  | 0.5376  | 0.60    | 0.3384  | 0.4517               | 0.79 Poisson(10.667) | 10            | 10.667   | 10.667 | 3.266  | 0.306    | 0.094  | 9.999  |        |  |
| Fit25                  | Palmarosa oil                | 8  | 13 | 12 | 9  | 11 | 10 | 10 | 20 | 8      | 0.0000   | 0.0000   | 0.0000   | 0.88    | 0.5334  | 0.6862  | 0.92    | 0.5378  | 0.7019               | 0.35 Poisson(11.625) | 11            | 11.625   | 11.625 | 3.410  | 0.293    | 0.086  | 10.957 |        |  |
| Fit26                  | Rose oil                     | 20 | 15 | 10 | 10 | 8  | 9  | 10 | 20 | 8      | 0.0000   | 0.0000   | 0.0000   | 0.50    | 0.4157  | 0.4543  | 0.22    | 0.2273  | 0.2227               | 1.50 Poisson(12.75)  | 12            | 12.750   | 12.750 | 3.571  | 0.280    | 0.078  | 12.082 |        |  |
| Fit27                  | Verbena oil                  | 27 | 25 | 10 | 13 | 10 | 12 | 10 | 25 | 8      | 0.0000   | 0.0000   | 0.0000   | 0.39    | 0.2674  | 0.3242  | 0.13    | 0.0112  | 0.0387               | 3.25 Poisson(16.5)   | 16            | 16.500   | 16.500 | 4.062  | 0.246    | 0.061  | 15.833 |        |  |
|                        |                              |    |    |    |    |    |    |    |    |        |          |          |          |         |         |         |         |         |                      | F-C-S Poisson =      | 10.48         |          |        |        |          |        |        |        |  |
|                        |                              |    |    |    |    |    |    |    |    |        |          |          |          |         |         |         |         |         |                      |                      | 8             | 0.2332   |        |        |          |        |        |        |  |
| <b>Mixtures</b>        |                              |    |    |    |    |    |    |    |    |        |          |          |          |         |         |         |         |         |                      |                      |               |          |        |        |          |        |        |        |  |
| Fit31                  | tetracycline hydrochloride   | 15 | 22 | 11 | 13 | 15 | 10 | 20 |    | 7      | 0.0000   | 0.0000   | 0.0000   | 0.93    | 0.6763  | 0.7916  | 0.90    | 0.6565  | 0.7707               | 0.26 Poisson(15.143) | 15            | 15.143   | 15.143 | 3.891  | 0.257    | 0.066  | 14.476 |        |  |
| Fit29                  | Ciproxin                     | 35 | 33 | 22 | 25 | 32 | 10 | 25 |    | 7      | 0.0000   | 0.0000   | 0.0000   | 0.70    | 0.4299  | 0.5483  | 0.37    | 0.1719  | 0.2529               | 1.37 Poisson(26)     | 26            | 26.000   | 26.000 | 5.099  | 0.196    | 0.038  | 25.333 |        |  |
|                        |                              |    |    |    |    |    |    |    |    |        |          |          |          |         |         |         |         |         |                      |                      | 1.64          |          |        |        |          |        |        |        |  |
|                        |                              |    |    |    |    |    |    |    |    |        |          |          |          |         |         |         |         |         |                      |                      |               | 2        | 0.4415 |        |          |        |        |        |  |
| <b>Not enough data</b> |                              |    |    |    |    |    |    |    |    |        |          |          |          |         |         |         |         |         |                      |                      |               |          |        |        |          |        |        |        |  |
| NoFit                  | <a href="#">CID: 8842</a>    | 25 | 18 |    | 8  |    | 7  |    |    | 4      |          |          |          |         |         |         |         |         |                      |                      | Poisson(14.5) | 14       | 14.500 | 14.500 | 3.808    | 0.263  | 0.069  | 13.832 |  |
|                        |                              |    |    |    |    |    |    |    |    |        |          |          |          |         |         |         |         |         |                      |                      |               | new data |        |        |          |        |        |        |  |
